# Supplementary material
Source: publisher figshare collection journal article supplement (https://gsajournals.figshare.com/ndownloader/files/21191805)
Supplement: Supplementary file 1 [file 21191805]

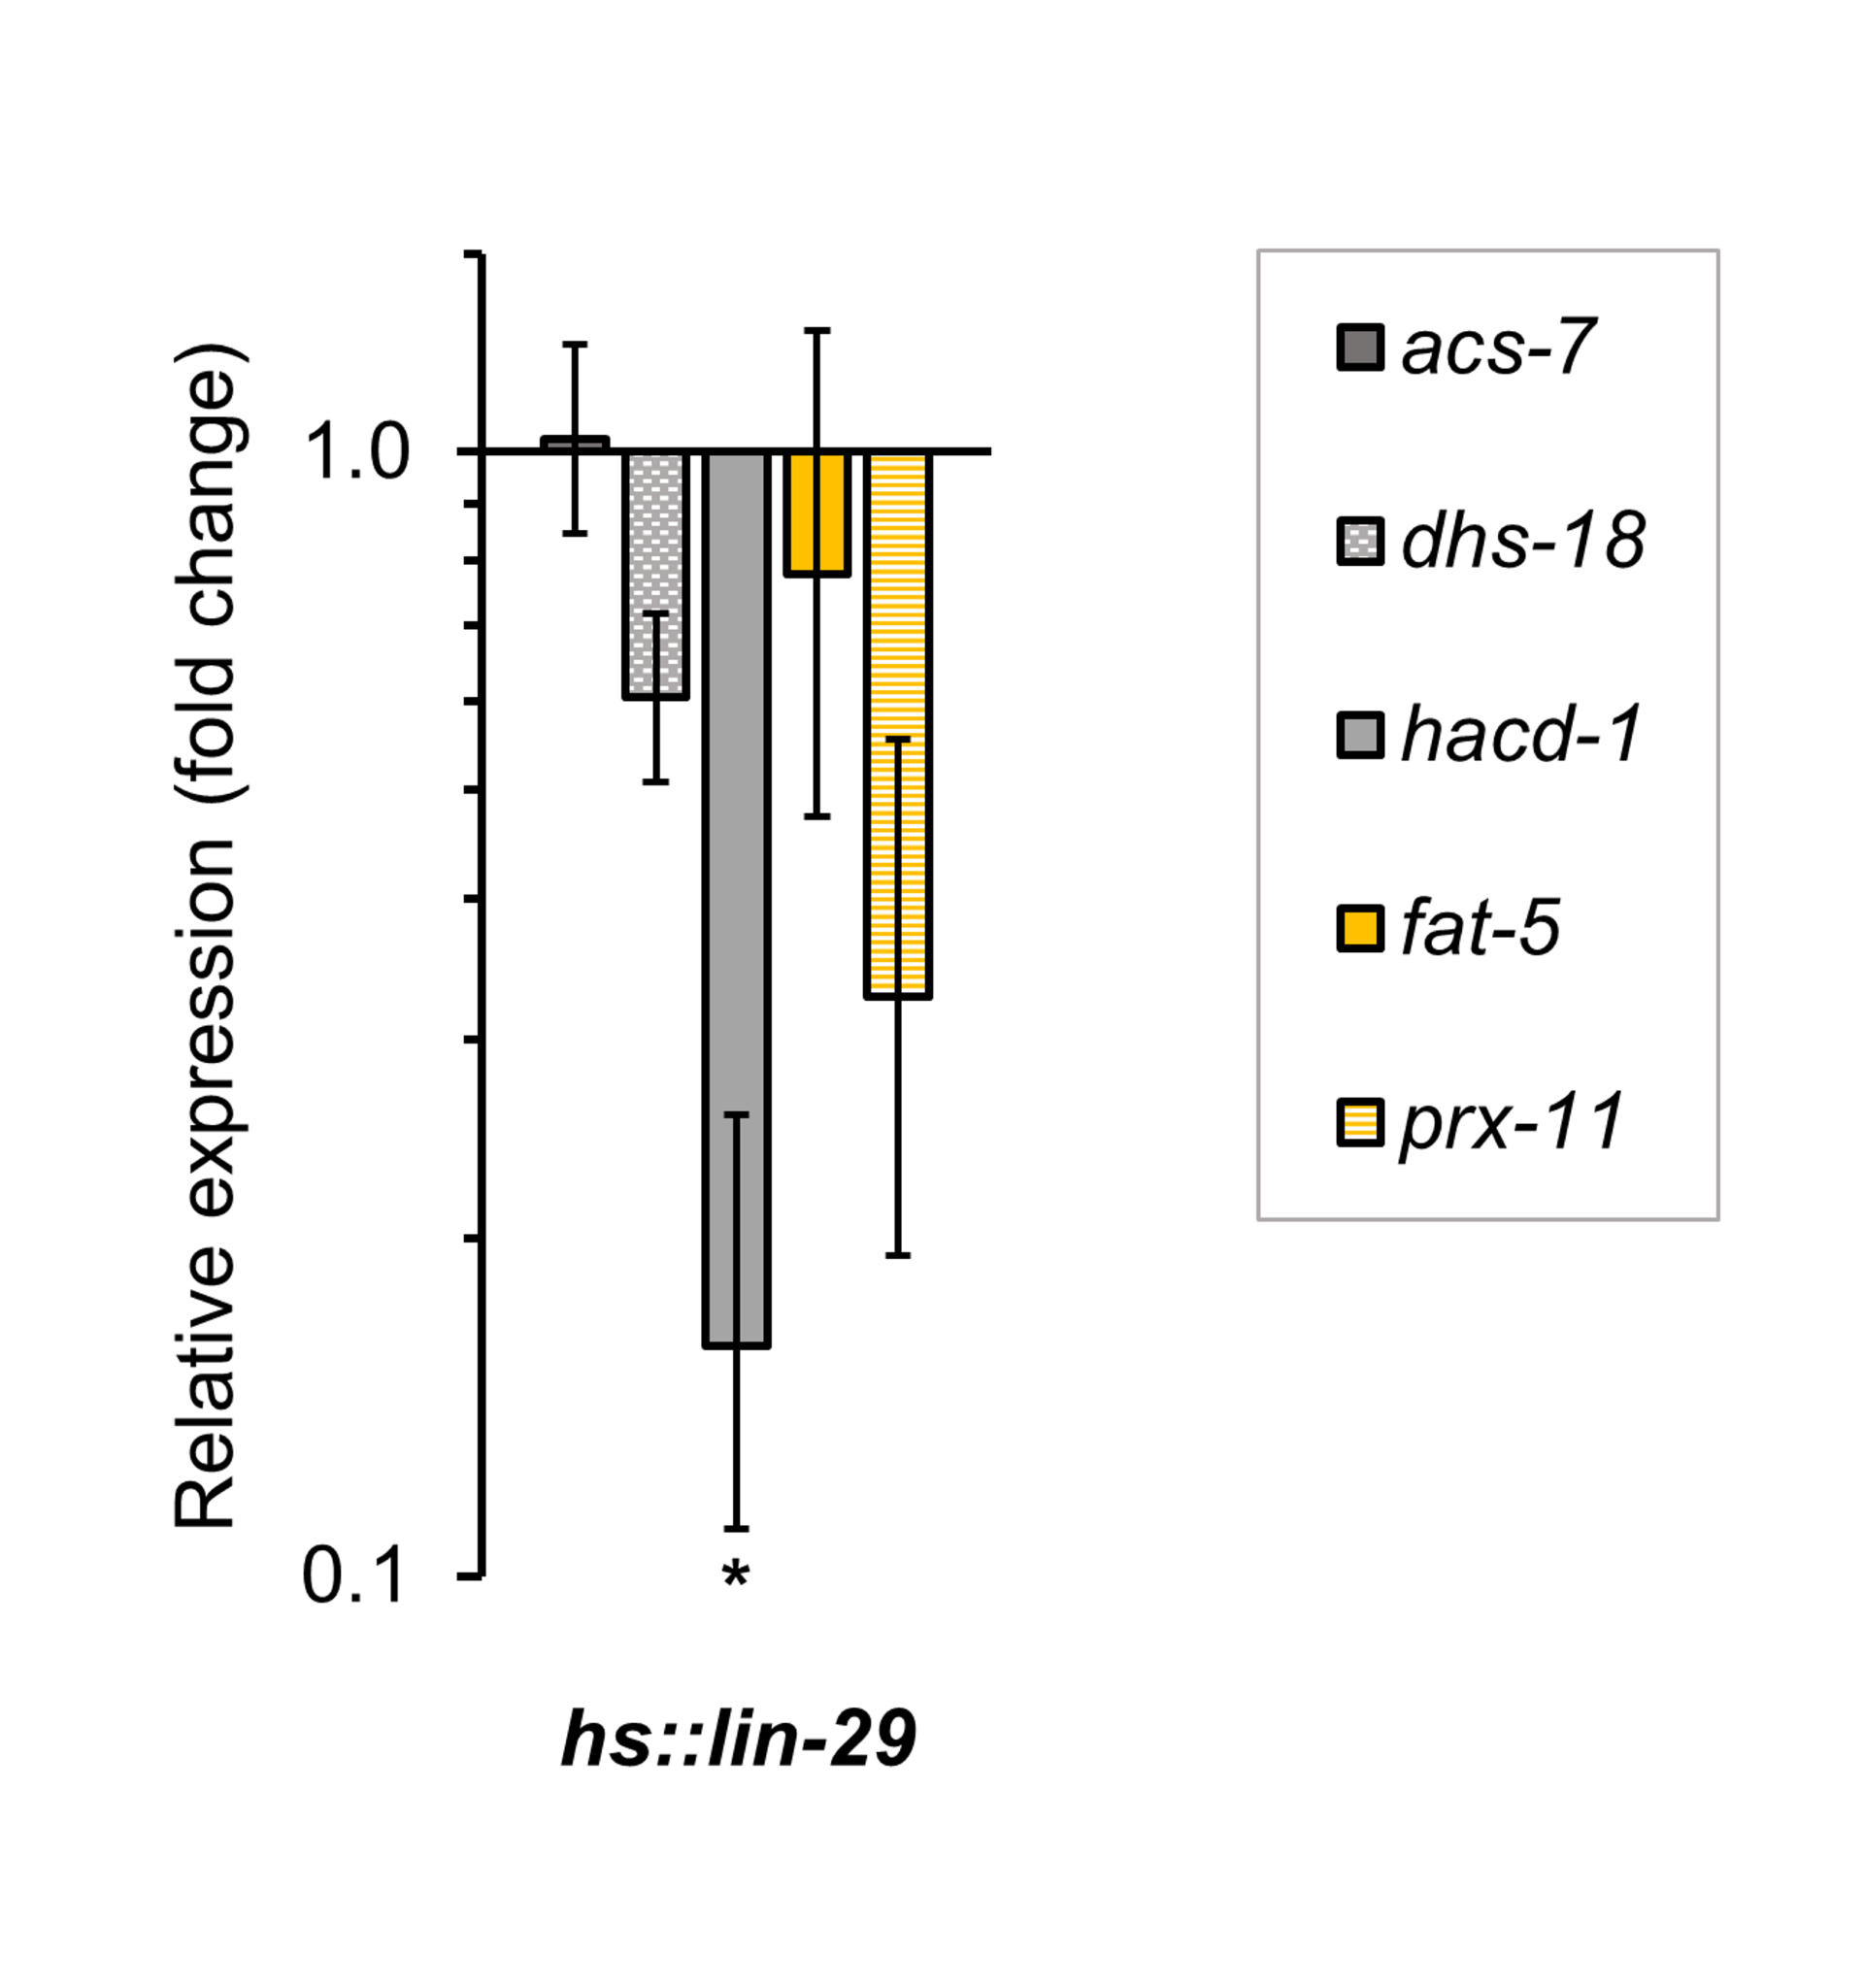


**Figure S5. Adult induction of LIN-29 is sufficient to represses expression of metabolic genes.** Expression of *acs-7*, *dhs-18*, *hacd-1*, *fat-5* and *prx-11* was evaluated by RT-qPCR in *hs::lin-29* animals after receiving heat shock induction in the adult stage (day 1). Quantification was relative to expression in *hs::control* animals. Error bars represent standard errors of the mean. **P*<0.05 (unpaired *t* test).
